# Supplementary figures and images for: Individual and combined effect of organic eutrophication (DOC) and ocean warming on the ecophysiology of the Octocoral Pinnigorgia flava
Source: PeerJ journal article supplement (doi:10.7717/peerj.14812), 2023-02-17

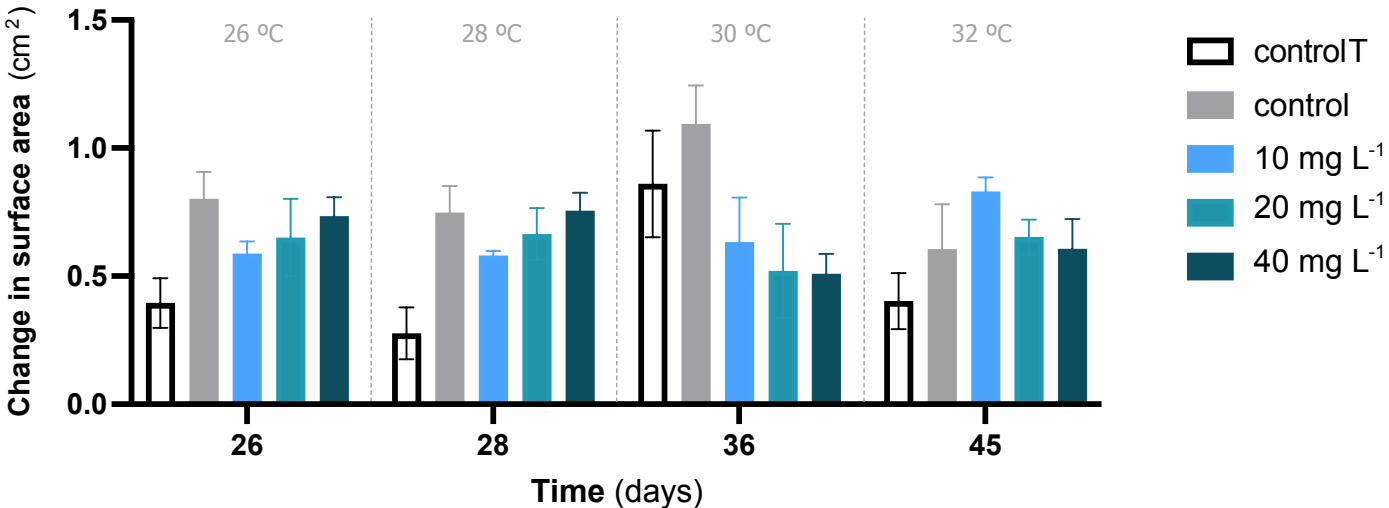

Supplement: peerj_-_71272_-_New_-_20_Dic_-_Supplementary_Files.zip [file peerj_-_71272_-_New_-_20_Dic_-_Supplementary_Files.zip]

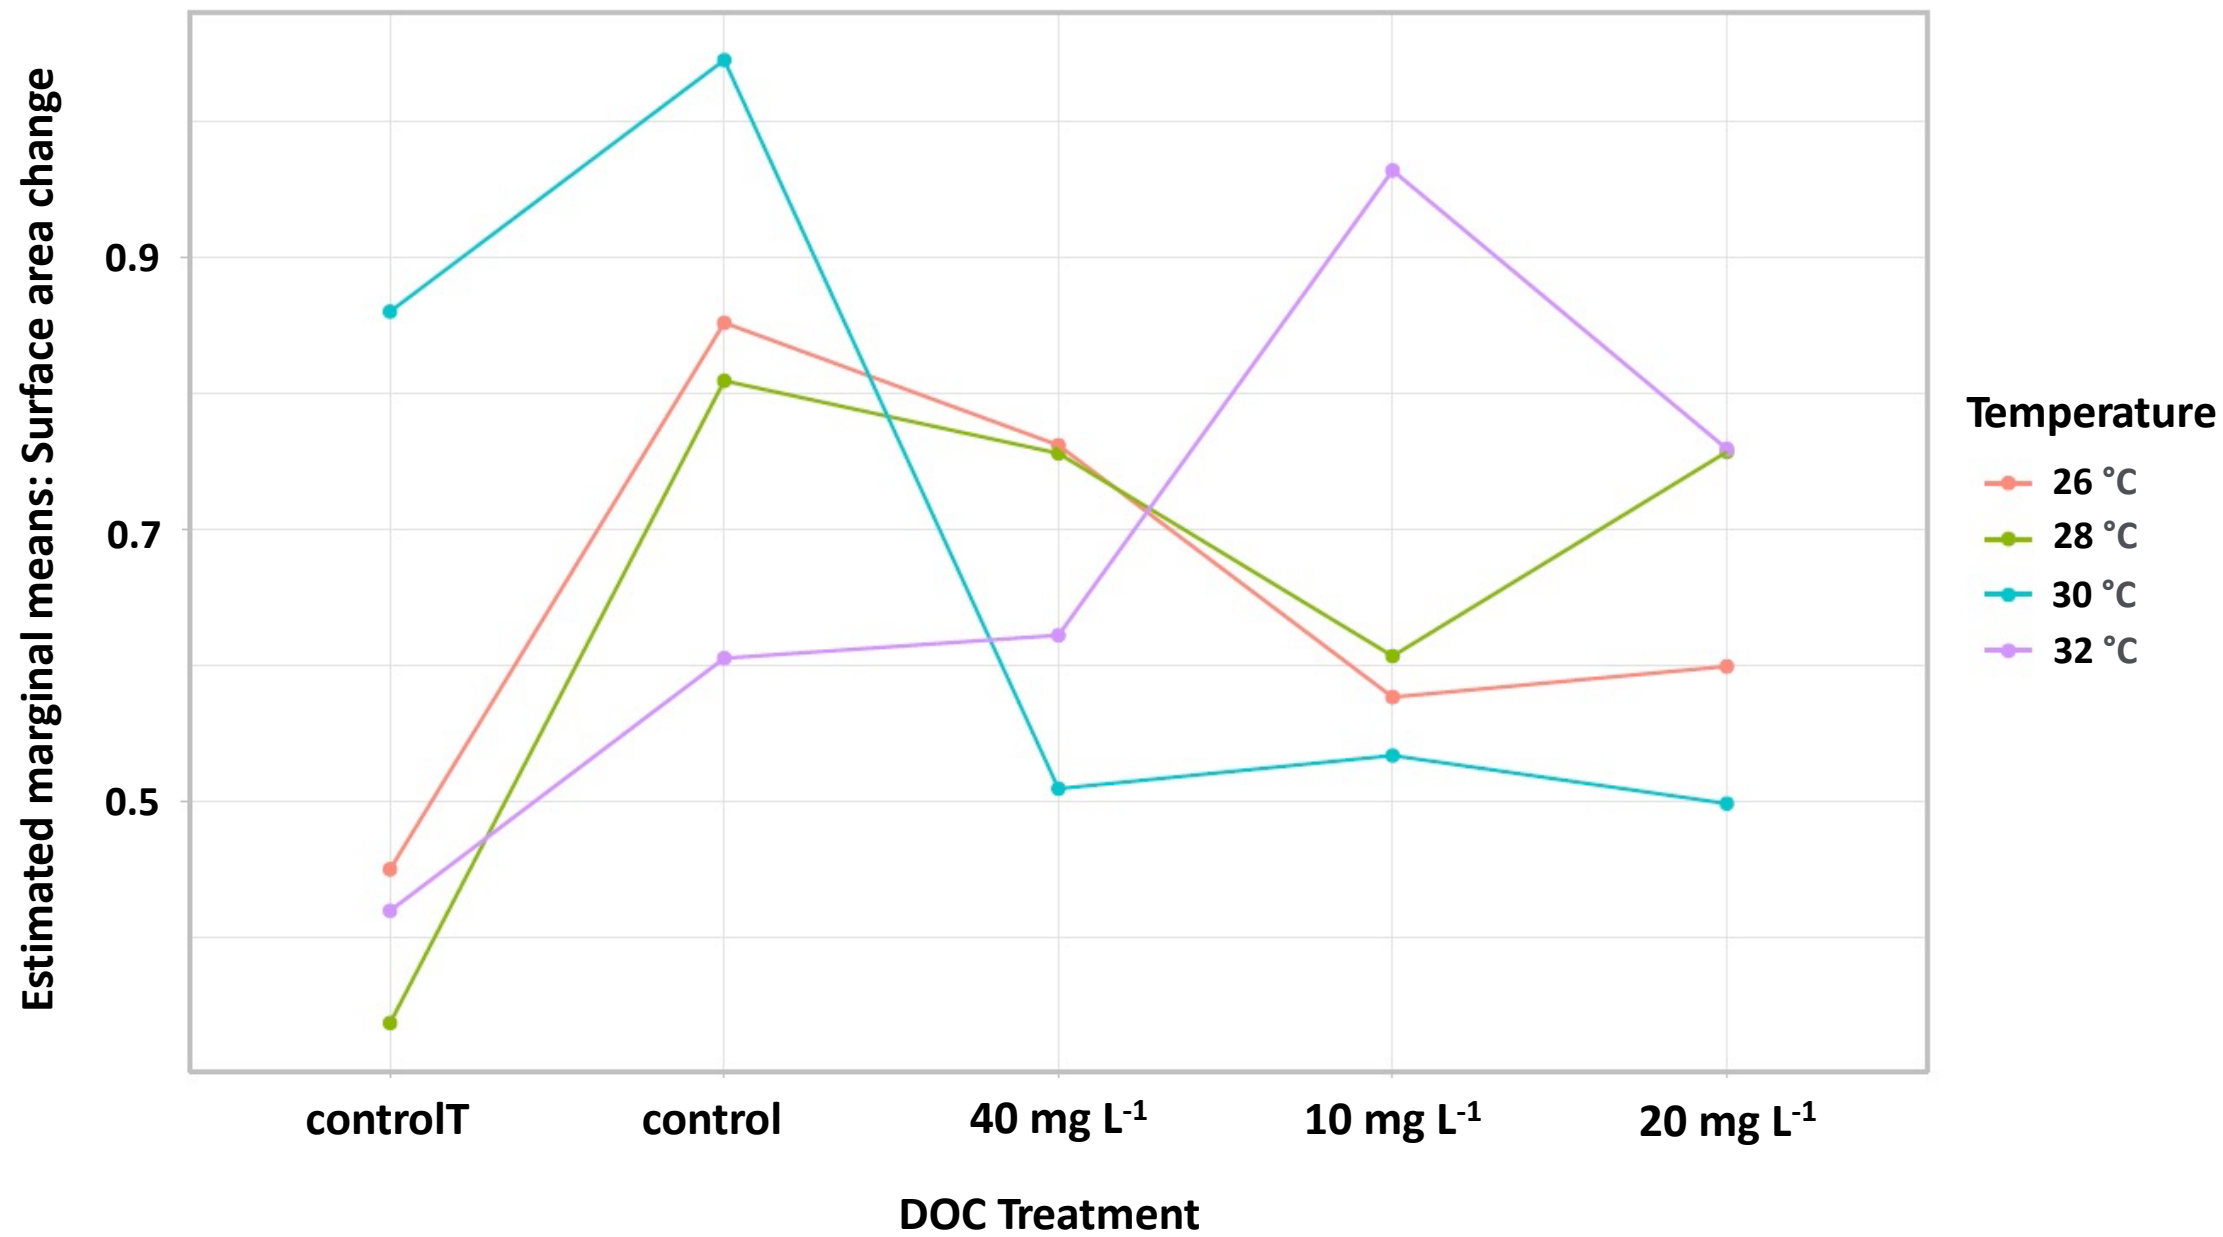

Supplement: peerj_-_71272_-_New_-_20_Dic_-_Supplementary_Files.zip [file peerj_-_71272_-_New_-_20_Dic_-_Supplementary_Files.zip]

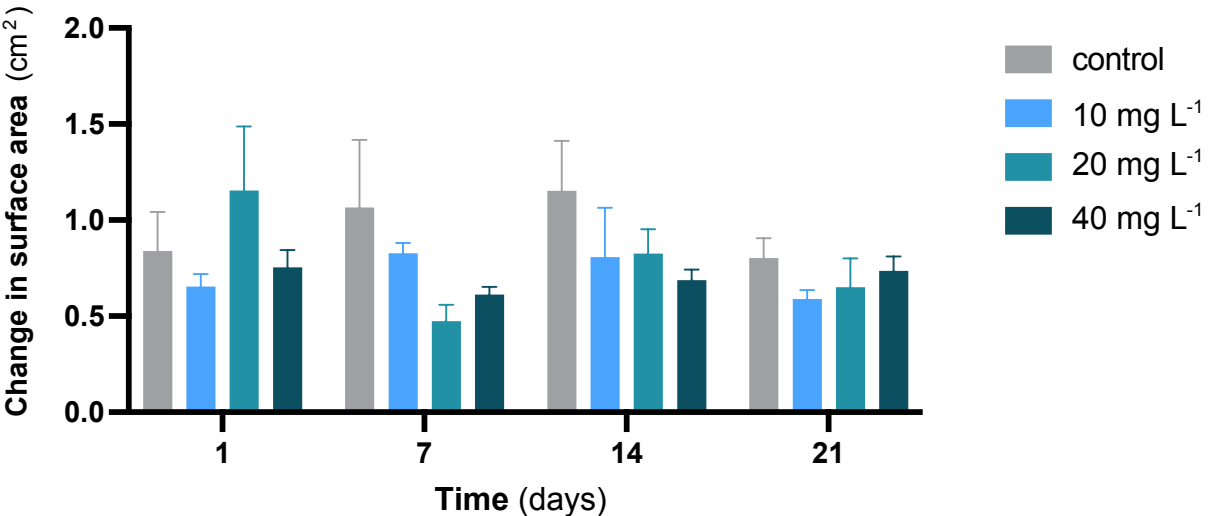

Supplement: peerj_-_71272_-_New_-_20_Dic_-_Supplementary_Files.zip [file peerj_-_71272_-_New_-_20_Dic_-_Supplementary_Files.zip]
